# Supplementary material for: Self reporting RNA probes as an alternative to cleavable small molecule mass tags
Source: Royal Society of Chemistry journal article supplement (doi:10.1039/c2an36086a), 2012-01-01
Supplement: c2an36086a.pdf [file c2an36086a.pdf]

# Self reporting RNA probes as an alternative to cleavable small molecule mass tags

Jo-Anne Riley,<sup>a</sup> Tom Brown,<sup>a</sup> Nittaya Gale,<sup>b</sup> Julie Herniman<sup>a</sup> and G. John Langley\*<sup>a</sup>

<sup>a</sup> Chemistry, FNES, University of Southampton, Southampton, SO17 1BJ, UK. Tel: (0) 23 8059 2182; E-mail: gjl@soton.ac.uk

<sup>b</sup> ATDBio LTD, University of Southampton, Southampton, SO17 1BJ, UK. Fax: (0)23 8059 2991; Tel: (0)23 8059 6778; E-mail: n.gale@soton.ac.uk

## Electronic Supplementary Information

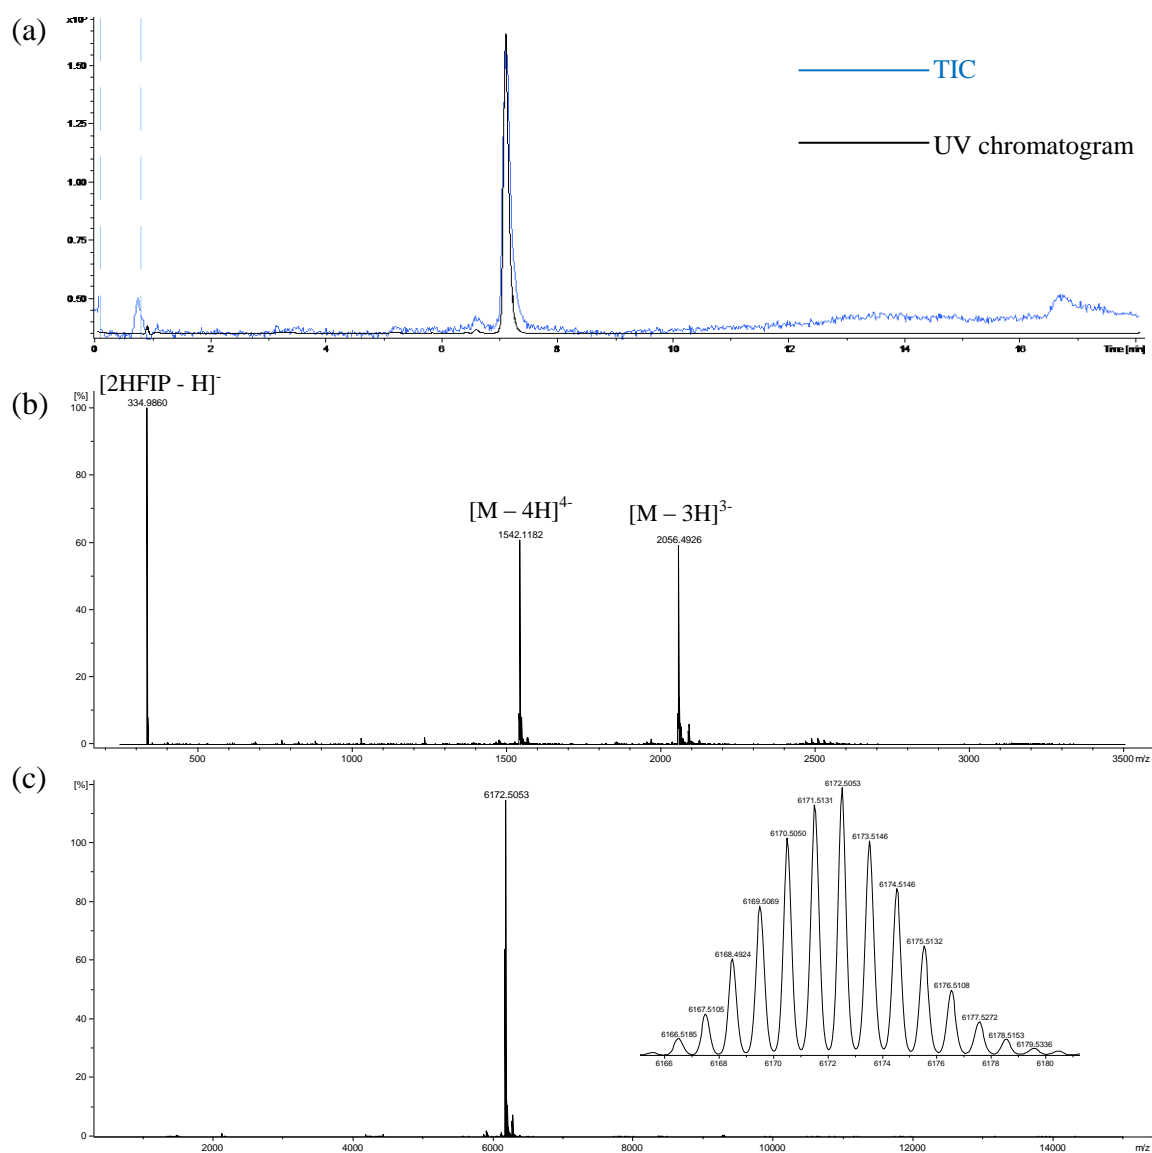

Figure S1 – HPLC-ESI MS analysis of ONT 1 prior to addition of RNase A, showing (a) TIC and UV chromatogram, (b) negative ion ESI mass spectrum and (c) MaxEnt deconvoluted spectrum

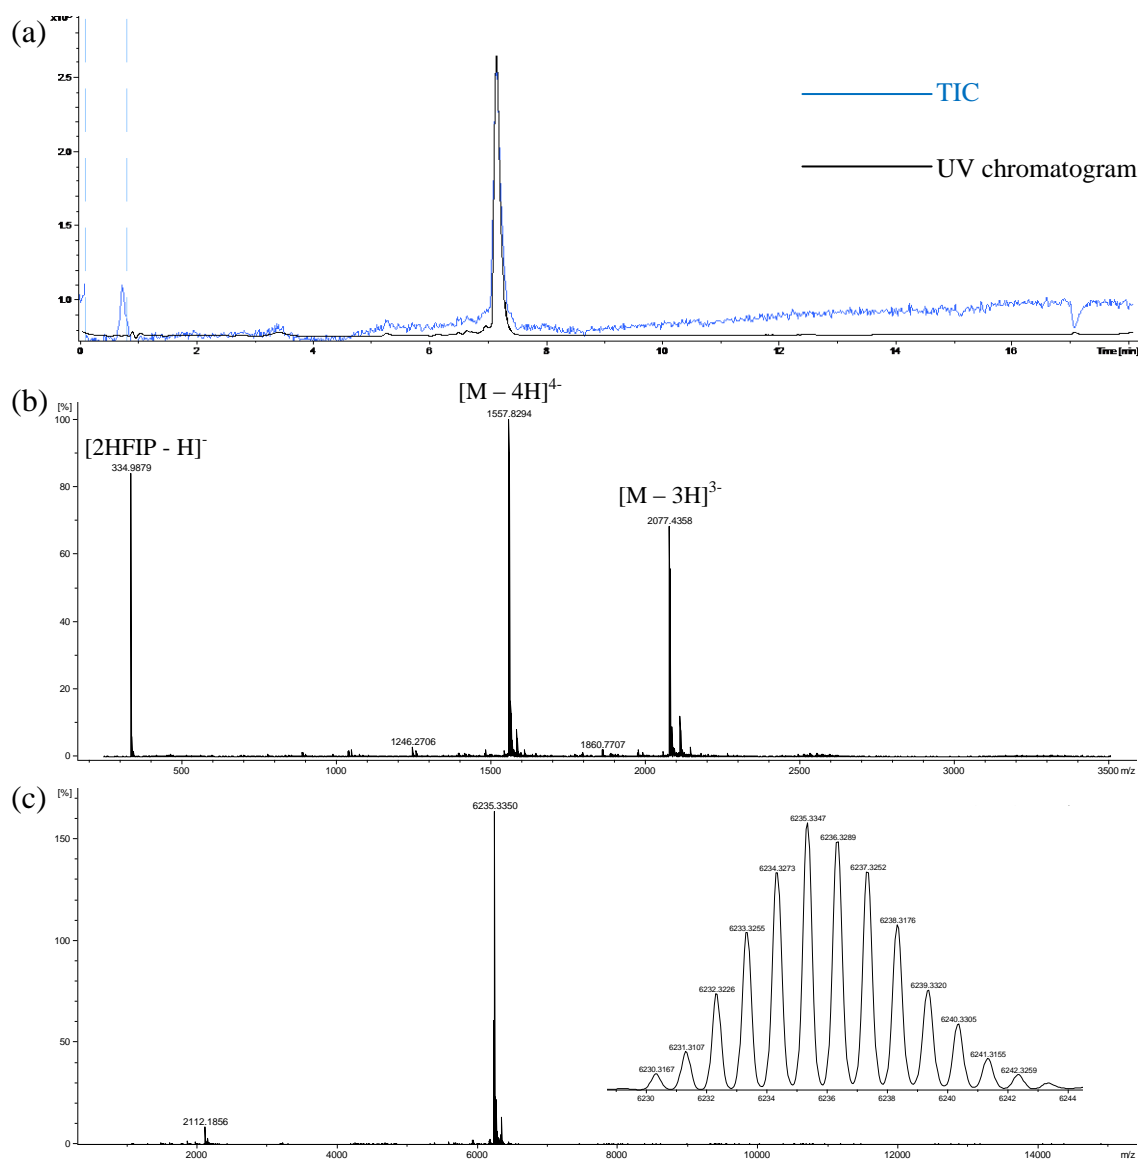

**Figure S2 – HPLC-ESI MS analysis of ONT 2 prior to addition of RNase A, showing (a) TIC and UV chromatogram, (b) negative ion ESI mass spectrum and (c) MaxEnt deconvoluted spectrum.**

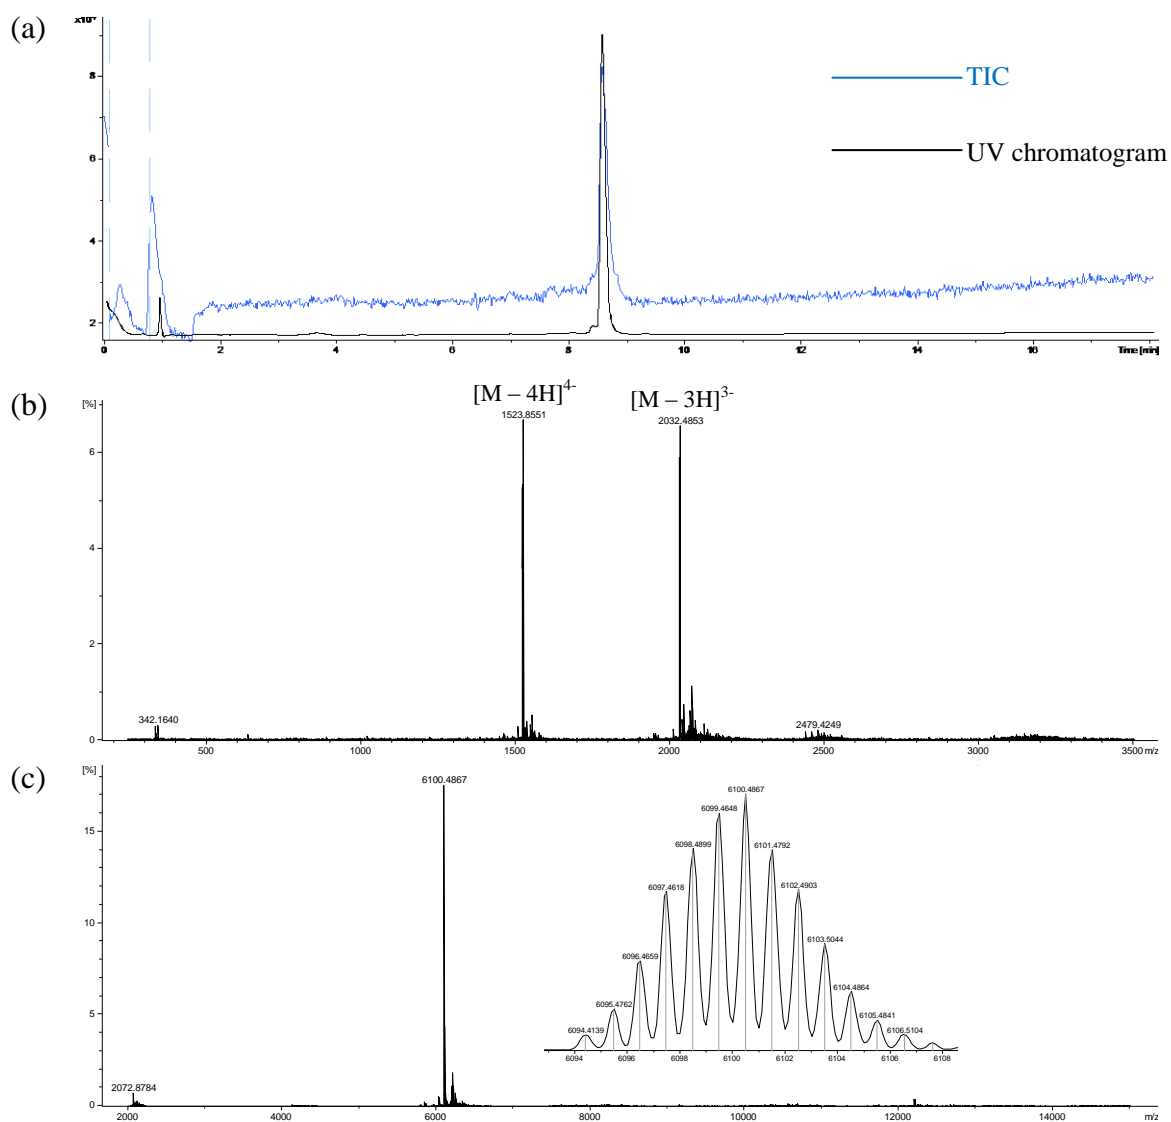

**Figure S3 – HPLC-ESI MS analysis of ONT 3 prior to addition of RNase A, showing (a) TIC and UV chromatogram, (b) negative ion ESI mass spectrum and (c) MaxEnt deconvoluted spectrum.**

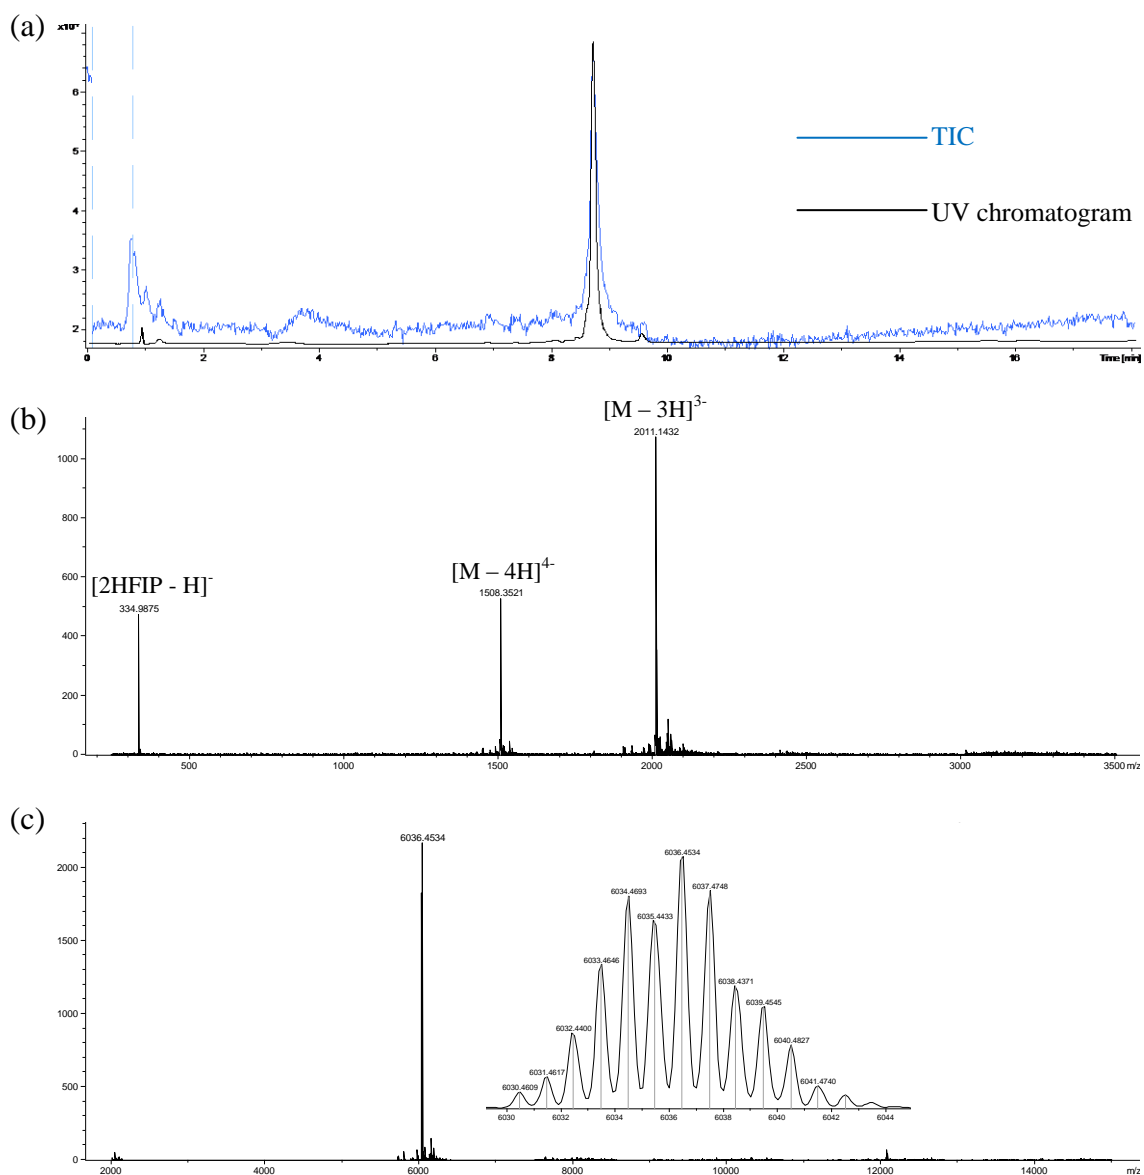

**Figure S4 – HPLC-ESI MS analysis of ONT 4 prior to addition of RNase A, showing (a) TIC and UV chromatogram, (b) negative ion ESI mass spectrum and (c) MaxEnt deconvoluted spectrum.**

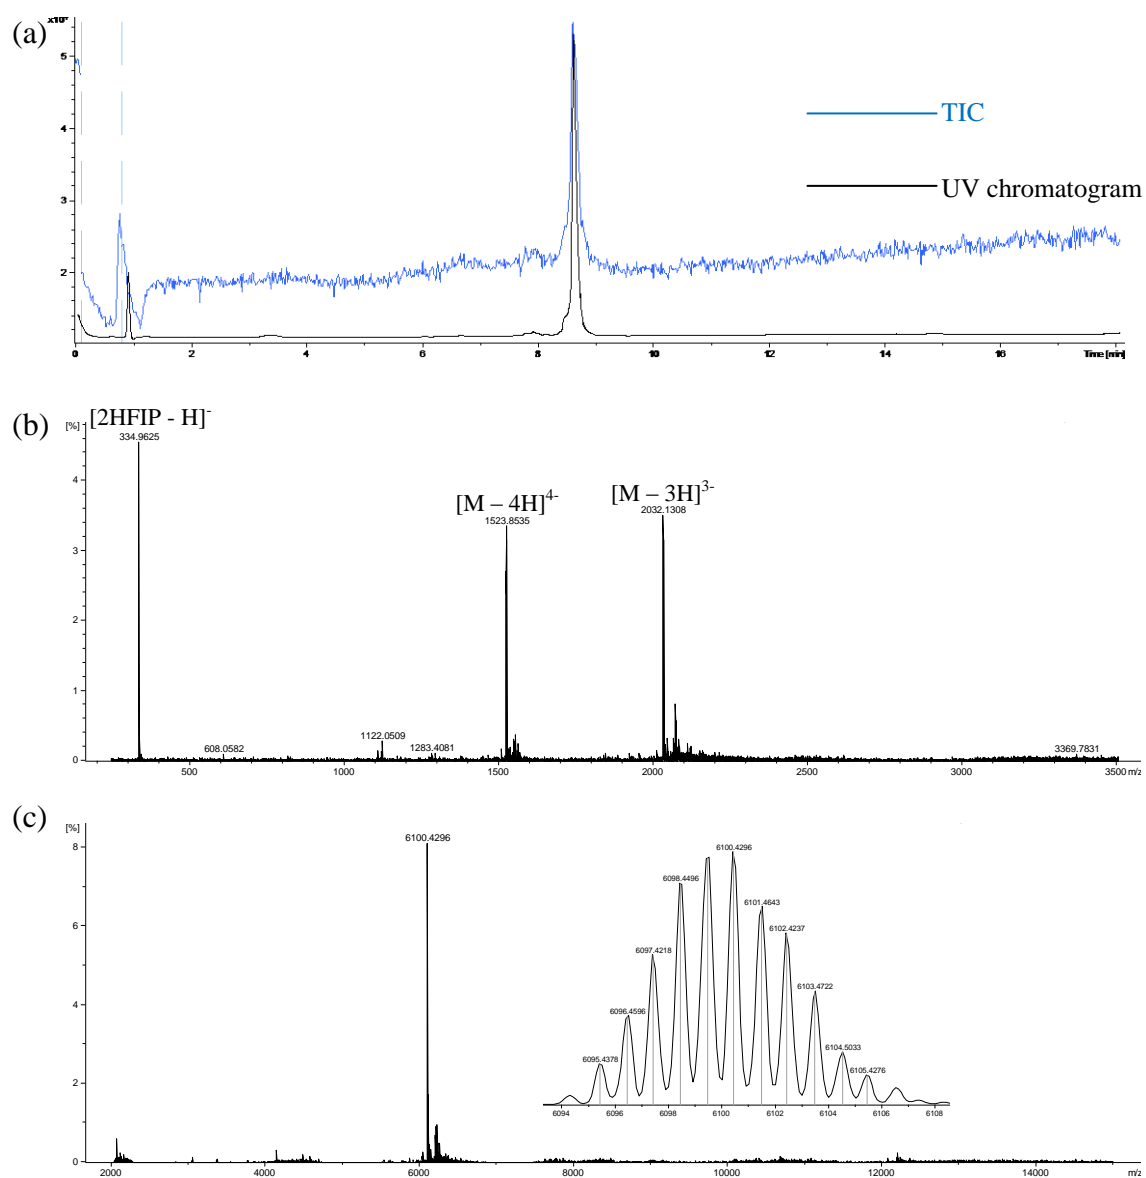

**Figure S5 – HPLC-ESI MS analysis of ONT 5 prior to addition of RNase A, showing (a) TIC and UV chromatogram, (b) negative ion ESI mass spectrum and (c) MaxEnt deconvoluted spectrum.**

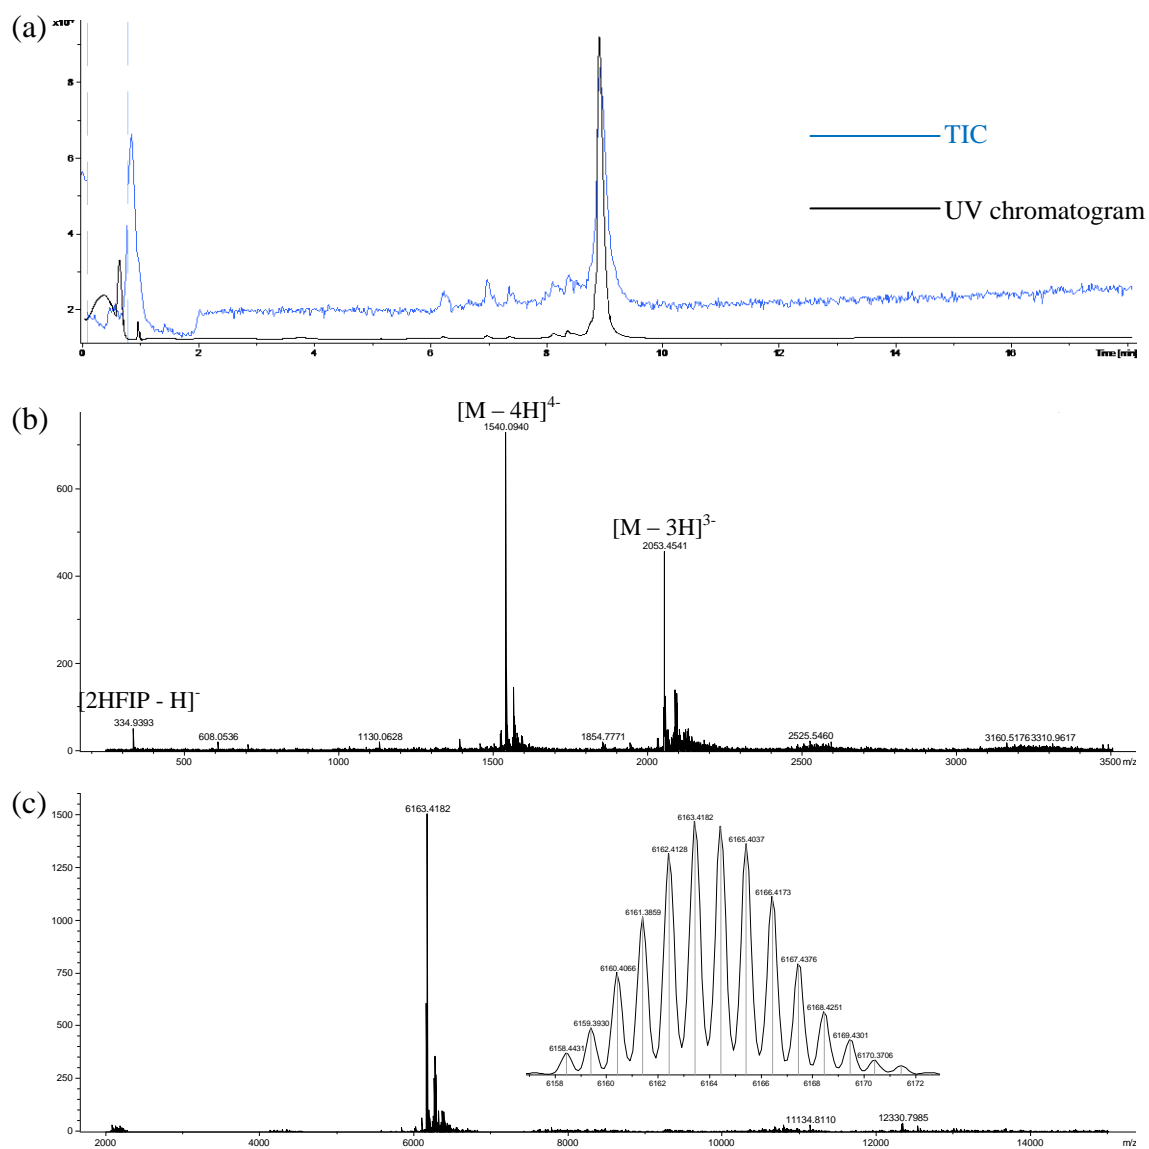

**Figure S6 – HPLC-ESI MS analysis of ONT 6 prior to addition of RNase A, showing (a) TIC and UV chromatogram, (b) negative ion ESI mass spectrum and (c) MaxEnt deconvoluted spectrum.**

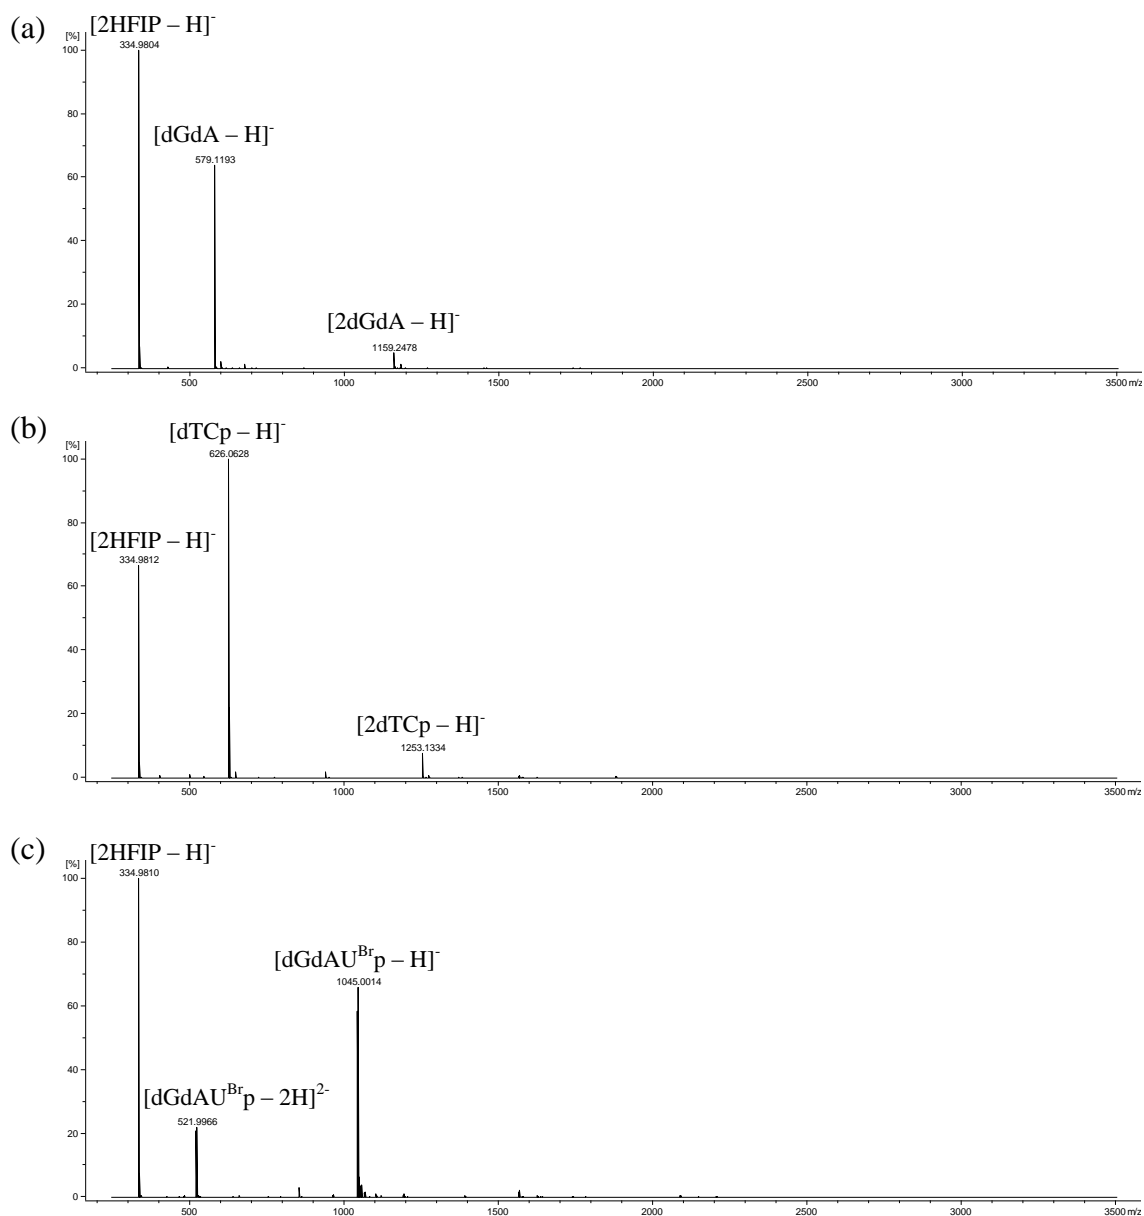

**Figure S7 – Negative ion ESI mass spectra of observed digestion products of ONT 5 sampled at 5 minutes eluting at  $t_R$  (a) 1.4 min., (b) 5.4 min. and (c) 6.7 min.  $U^{Br}$  = 5-Bromouridine, HFIP = hexafluoroisopropanol.**

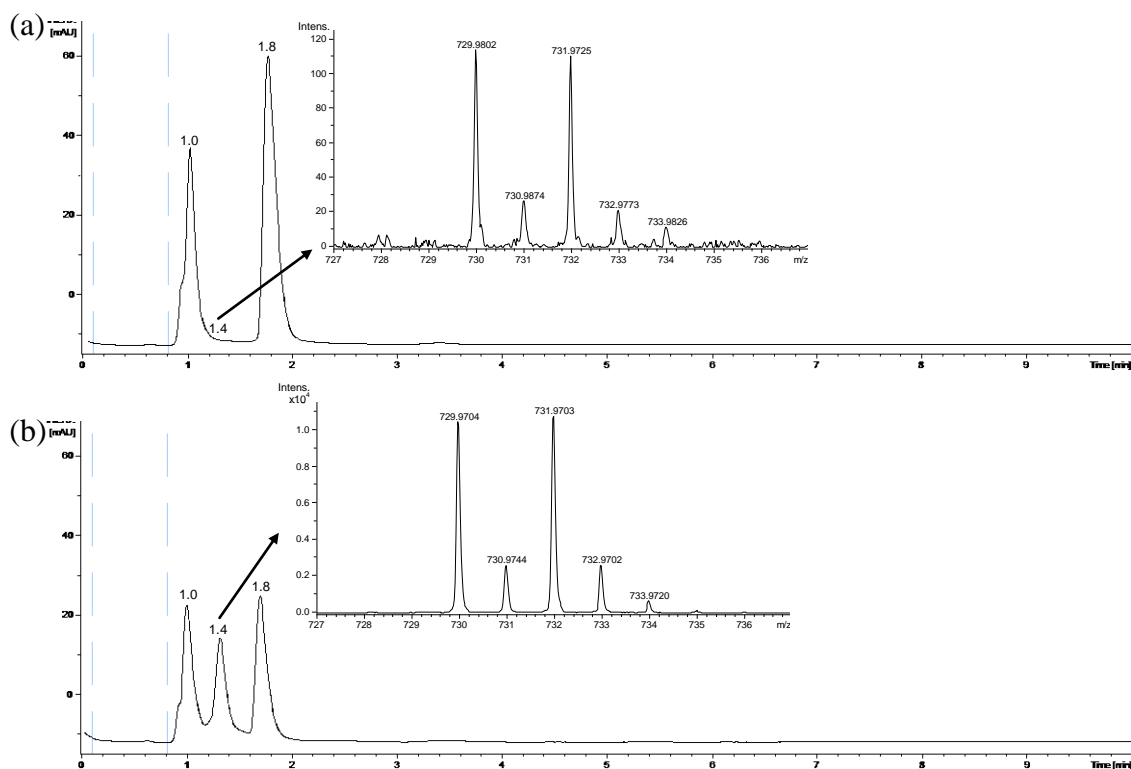

**Figure S 8 – HPLC-ESI MS analysis of ONT 1 sampled at (a) 5 minutes and (b) 24 hours showing UV chromatograms and negative ion ESI mass spectra of the brominated overdigestion product  $\text{AU}^{\text{Br}}\text{p}$ .  $\text{U}^{\text{Br}}$  = 5-bromouridine and  $\text{p}$  = 3'-phosphate. N.B. mobile phase gradient normally used for analysis of intact RNA was used for this analysis.**



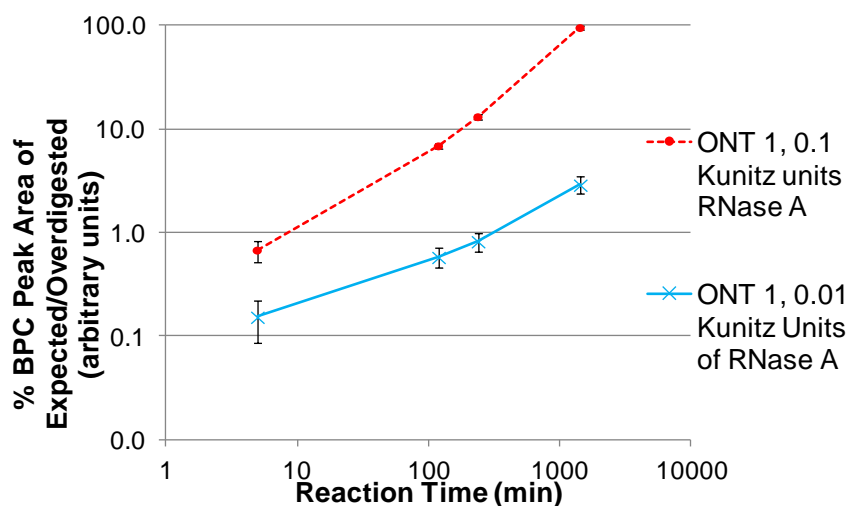

Figure S 9 – A graph showing the peak area of AU<sup>Br</sup>p compared to AAU<sup>Br</sup>p for ONT 1 under different assay conditions. Error bars show  $\pm 1$  standard deviation from triplicate results. d = deoxynucleotide, p = 3'-phosphate

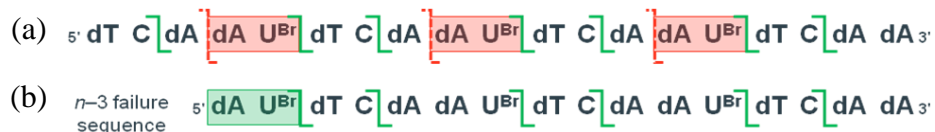

Figure S10 – RNase A expected cleavage sites (green solid line) and unexpected, non-specific cleavage sites (red dashed line) for (a) ONT 1 and (b) the *n*-3 failure sequence of ONT 4, highlighting the proposed origins of the unexpected dinucleotide products. U<sup>Br</sup> = 5-bromouridine
